1 **Crop diversity enhances disease suppressive potential in soils**

2

3

4 Ariane L. Peralta,<sup>a,b,#\*</sup> Yanmei Sun,<sup>a\*</sup> and Jay T. Lennon<sup>b</sup>

5

6 Department of Biology, East Carolina University, Greenville, NC, USA<sup>a</sup>; Department of

7 Biology, Indiana University, Bloomington, IN, USA<sup>b</sup>

8

9 Running Head: Crop diversity enhances disease suppression

10

11 #Address correspondence to Ariane L. Peralta, e-mail: [peraltaa@ecu.edu](mailto:peraltaa@ecu.edu)

12 \*A.L.P and Y.S. contributed equally to this work.

13

14 Keywords: crop diversity; disease suppression; microbial diversity; structure-function

15 relationships

16

17

18

19

20

21

22

23

24 **ABSTRACT**

25 Agricultural management can have lasting impacts on microbial community structure and  
26 function through changes in biotic (i.e., plant inputs) and abiotic (i.e., soil fertility) soil  
27 properties. Enhancing biodiversity is expected to increase ecosystem functions, and in an  
28 agricultural context, such functions include enhanced plant production and pest suppression. For  
29 example, disease suppressive soils are characterized by the biocontrol properties provided by  
30 resident soil microorganisms capable of producing antifungal or antibacterial compounds known  
31 to suppress the growth of soil-borne pathogens. In this study, we investigated the impact of long-  
32 term crop diversity on microbial communities and disease suppressive functional potential in  
33 soils. In 2012, we collected soil samples from the Biodiversity Gradient Experiment (established  
34 in 2000) at the Kellogg Biological Station Long-Term Ecological Research (KBS-LTER) site.  
35 We sampled 7 treatments along the crop diversity gradient (monoculture to 5 crop species) and a  
36 spring fallow treatment to examine the influence of crop diversity on total bacterial community  
37 composition (16S rRNA amplicon sequencing) and a subset of microorganisms capable of  
38 producing antifungal compounds (2,4-diacetylphloroglucinol: *phlD* gene fingerprint analysis;  
39 pyrrolnitrin: *prnD* gene quantitative PCR). Our study revealed that crop diversity significantly  
40 influenced bacterial community composition and abundance of disease suppressive functional  
41 groups. Variation in plant inputs to soil organic matter pools may be a possible mechanism  
42 driving shifts in microbial community patterns and disease suppressive functional potential.

43

44

45

46

## 47 INTRODUCTION

48 Intensive agricultural management leads to reduced biodiversity and declines in  
49 ecosystem functions (1). However, crop diversification within agricultural landscapes is known  
50 to restore ecosystem functions such as carbon sequestration, pest control, and nutrient cycling (2,  
51 3). Restoring ecosystem functions remains challenging to achieve given the loss of complex  
52 biological, chemical, and physical functions that natural ecosystems provide and humans value  
53 (i.e., ecosystem services). Understanding the effect of crop diversity on microbial contributions  
54 to plant health can provide us with tools to enhance plant productivity beyond additions of  
55 chemical inputs (4-7). Enhancing aboveground biodiversity (i.e., incorporating cover crops,  
56 perennial crops) could enhance ecological functions in the context of agricultural production and  
57 environmental quality. By managing soils to support more complex soil food webs, ecosystem  
58 services such as nutrient cycling regulation and natural pest suppression can be restored (7-9).

59 Soil microorganisms influence plant growth and reproduction through solubilization of  
60 mineral nutrients in soil (10), N<sub>2</sub> fixation (11), plant growth promotion (12), and plant pathogen  
61 suppression (13-15). Plant-microbe interactions directly influence community composition above  
62 and belowground through plant-soil feedback mechanisms. The exchange of resources between  
63 plants and microorganisms can positively or negatively impact plant growth rates. The plant  
64 influences microbial community composition, and this change can affect plant growth rates (13,  
65 16, 17). In addition, plants contribute root exudates with different qualities providing a variety of  
66 carbon substrates to soil microbes (18-21).

67 A subset of soil microorganisms is known to exhibit antimicrobial properties, which  
68 ultimately provide plants with protection from soil-borne plant pathogens. This disease  
69 suppressive capacity has been associated with the abundance of antagonistic bacteria and

70 associated reductions in fungal pathogens (14, 22). Bacterial production of secondary  
71 metabolites 2,4-diacetylphloroglucinol (DAPG) and pyrrolnitrin (PRN) are two potent bacterial  
72 toxins known to suppress fungal pathogens in agricultural soils (14, 23, 24). In a previous study,  
73 increased plant diversity was associated with enhanced soil suppressiveness measured by  
74 increased DAPG and PRN producers (25). In addition, streptomycetes are a well-known group of  
75 microbes to have antibiotic inhibitory effects and contribute to disease suppression in agricultural  
76 soils (15, 26). However, the diversity, composition, and disease suppressive activity among  
77 streptomycetes communities was similar among high and low plant diversity treatments (27).  
78 Thus, the relationship between biodiversity and disease suppression in agricultural soils remains  
79 unclear. By focusing on disease suppressive capacity of soil, we can evaluate how agricultural  
80 land-use strategies and subsequent changes in the soil environment and resident microbes impact  
81 contemporary plant growth (27, 28).

82 Heavily managed agroecosystems are ideal locations to test the influence of crop  
83 diversity effects on soil microorganisms. Specifically, long-term, replicated crop diversity trials  
84 provide a unique opportunity to focus on plant effects on soil microbial communities. Our  
85 research addresses the following questions: (1) What is the relationship between crop diversity  
86 and soil microbial community composition and disease suppressive functional potential? and (2)  
87 what is the relationship between changes in soil physicochemical properties and soil microbial  
88 community composition and disease suppressive functional potential in response to a crop  
89 diversity gradient? We tested the hypothesis that plant and microbial biodiversity provide disease  
90 suppressive functions in soils. We predicted that soil microbes established under high crop  
91 diversity (i.e., long crop rotations) have relatively higher soil suppressive capacity compared to  
92 soil microbes developed under low crop diversity (i.e., short crop rotation).

## 93 MATERIALS AND METHODS

94

### 95 Experimental design

96 We collected at the Biodiversity Gradient Experiment plots at W.K. Kellogg Biological  
97 Station Long-Term Ecological Research (KBS LTER) site in southwest, Michigan, USA. These  
98 soils are Kalamazoo (fine-loamy) and Oshtemo (coarse-loamy) mixed, mesic, Typic Hapludalfs  
99 formed under glacial outwash (29). We sampled six diversity treatments including monoculture,  
100 two-crop rotation, and three-crop rotation with two or three cover crops and a spring fallow  
101 treatment (Table 1). Cover crops included in this experiment were red clover (*Trifolium pretense*  
102 L.), crimson clover (*Trifolium incarnatum* L.) and cereal rye (*Secale cereal* L.). Plantings of  
103 cover crop were dependent on the main crop in rotation (30). A complete set of biodiversity plots  
104 is replicated four times. No additional fertilizer is applied to these plots.

105

### 106 Field sampling

107 We sampled 7 treatments (Table 1) all in the corn phase of the rotation along the biodiversity  
108 gradient and a spring fallow treatment. At each of the four replicate 10 x 20 m plots, we  
109 combined five soil cores (5 cm diameter) to a 10 cm depth. A subsample from each composite  
110 sample was sieved through 4 mm in the field, flash frozen in the field in liquid nitrogen, and  
111 stored at -80 °C prior to molecular-based microbial analyses. On a subsample of field-collected  
112 soil, we analyzed inorganic nitrogen (N) (KCl extractable ammonium and nitrate) and  
113 gravimetric soil moisture. The remaining soil was air-dried and ground for analysis of soil pH  
114 and total C and N based on elemental combustion analysis.

115

## 116 **Bacterial community sequencing**

117 We extracted DNA using the MoBio PowerSoil® DNA Isolation Kit Soil (MO BIO  
118 Laboratories, Inc., Carlsbad, CA). DNA concentration was adjusted to a standard concentration  
119 of 20 ng  $\mu\text{l}^{-1}$  and used as template in PCR reactions. To characterize bacterial taxonomic  
120 diversity, we used barcoded primers (515f/806r primer set) developed by the Earth Microbiome  
121 Project to target the V4-V5 region of the bacterial 16S subunit of the ribosomal RNA gene  
122 (rDNA) (31). For each sample, PCR product combined from three 50  $\mu\text{l}$  reactions, concentration  
123 quantified, and PCR product from each soil sample was combined in equimolar concentrations  
124 for paired-end 250 $\times$ 250 sequencing using the Illumina MiSeq platform according to details in M.  
125 Muscarella, et al. (32). Briefly, we assembled the paired-end 16S rRNA sequence reads using the  
126 Needleman algorithm (33). All sequences were subjected to systematic checks to reduce  
127 sequencing and PCR errors. High quality sequences (i.e., >200 bp in length, quality score of >25,  
128 exact match to barcode and primer, and contained no ambiguous characters) were retained. In  
129 addition, we identified and removed chimeric sequence using the UCHIME algorithm (34). We  
130 aligned our sequence data set with the bacterial SILVA-based bacterial reference database (35).  
131 During data analysis, operational taxonomic units (OTUs) were binned at 97% sequence identity  
132 and phylogenetic classifications of bacterial sequences performed. Sequences were processed  
133 using the software package *mothur* v.1.35.1 (36, 37).

134

## 135 **Composition and abundance of disease suppression genes**

136 We classify disease suppressive taxa as the subset of soil microorganisms possessing  
137 genes that are required for the production of antifungal compounds 2,4-diacetylphloroglucinol  
138 (DAPG) and pyrrolnitrin (PRN) (14, 24). We assessed the composition of disease suppressive

139 microorganisms by targeting the *phlD* gene using terminal restriction fragment length  
140 polymorphism (T-RFLP) (38). For *phlD* gene amplification, the forward primer B2BF (5'-  
141 ACCCACCGCAGCATCGTTTATGAGC-3') and reverse primer FAM-BPR4 (5'-  
142 CCGCCGGTATGGAAGATGAAAAAGTC-3') to yield a 629 bp product. In each 25  $\mu$ L PCR  
143 reaction, we combined 5% dimethylsulfoxide, 0.8 mg ml<sup>-1</sup> bovine serum albumin, 1 $\times$   
144 GoTaq®Colorless Master Mix (Promega, Madison, WI), 0.2  $\mu$ M of each primer and 5  $\mu$ L of  
145 template DNA. Reactions were cycled with initial denaturation at 94 °C for 2 min, followed by  
146 35 cycles of 94 °C for 1 min, 60 °C for 1 min, and 72 °C for 2 min, with a final extension carried  
147 out at 72 °C for 10 min (38). The amplified PCR products were purified with QIAquick PCR  
148 purification kit (Qiagen, Valencia, CA). After purification, amplicons generated from each  
149 sample were digested in multiple restriction enzymes overnight in 12  $\mu$ L reaction mixtures  
150 containing 4  $\mu$ L of PCR product, 1 $\times$  enzyme buffer (38). After digestion, the enzymes were  
151 inactivated for 5 min at 80 °C, and the digested products were purified according to the  
152 purification kit protocol (Qiagen, Valencia, CA). For T-RFLP analysis, we combined 1.5  $\mu$ L of  
153 the digested product with 9  $\mu$ L of HiDi formamide (Applied Biosystems, Foster City, CA) and  
154 0.4  $\mu$ L of internal size standard ABI GeneScan LIZ 600 (Applied Biosystems, Foster City, CA).  
155 The samples were incubated for 3 min at 96 °C and then stored on ice prior to fragment analysis.  
156 We determined the length and relative abundance of terminal restriction fragments (T-RFs) using  
157 an ABI 3130 $\times$ 1 Genetic Analyzer (Applied Biosystems, Foster City, CA). Electrophoresis  
158 conditions were 60 °C and 15 kV with a run time of 41 min using POP-7 polymer. The resulting  
159 data was analyzed using GeneMapper Software 4.0 (Applied Biosystems, Foster City, CA). The  
160 peak detection limit was set to 50 fluorescence intensity units.

161 We assessed the relative functional gene abundance of disease suppression by targeting

162 the *prnD* gene using quantitative PCR (qPCR) (24). The partial *prnD* gene abundance was  
163 quantified using a SYBR green assay with primers *prnD*-F (5'-TGCACTTCGCGTTCGAGAC-  
164 3') and *prnD*-R (5'-GTTGCGCGTCGTAGAAGTTCT-3') (24). The 25  $\mu$ L PCR reaction  
165 contained 1 $\times$  GoTaq®Colorless Master Mix (Promega, Madison, WI), 0.4  $\mu$ M of each primer,  
166 and 5  $\mu$ L of template DNA. Cycling conditions were the following: initial cycle 95  $^{\circ}$ C, 10 min,  
167 and 30 cycles of 95  $^{\circ}$ C, 15 s and 60  $^{\circ}$ C, 1 min. For the qPCR standard curve, *prnD* gene was  
168 amplified from soil genomic DNA. PCR fragments were cloned to pGEM®-T Easy Vector  
169 System according to the manufacturer's manual (Promega, Madison, WI). Plasmids were  
170 extracted using the QIAprep® Spin Miniprep kit (Qiagen, Valencia, CA), and cloned fragments  
171 were verified by PCR and agarose gel electrophoresis. Dilutions of plasmid DNA containing  
172 *prnD* gene were used to generate standard curves in quantities ranging from  $5.0 \times 10^2$  to  $5.0 \times$   
173  $10^7$  copies. We quantified the *prnD* gene in 25  $\mu$ L reaction volumes containing about 20 ng DNA  
174 template, 1 $\times$ TaqMan Environmental Master Mix 2.0 (Applied Biosystems, Valencia, CA), 1 $\times$   
175 SYBR green I, and 0.4  $\mu$ M of each primer. Fragments were amplified with an initial denaturation  
176 step at 95  $^{\circ}$ C for 10 min, followed by 40 cycles of 95  $^{\circ}$ C for 15 s, 60  $^{\circ}$ C for 1 min. For each  
177 sample, PCR reactions were run in triplicate. We obtained standard curves based on serial  
178 dilutions of mixed PCR product amplified from soil samples. Reactions were analyzed on a BIO-  
179 RAD CFX-96™ Real-Time System (Bio-Rad, Hercules, California, USA).

180

## 181 **Statistical analyses**

182 We used Principal Coordinates Analysis (PCoA) to visualize microbial community  
183 composition based on the Bray-Curtis dissimilarity coefficient for each possible pair of samples  
184 was used to visualize patterns of community composition using the R statistical package (R Core



185 Development Team 2015). To test for differences in bacterial communities among crop diversity  
186 treatments, we used permutational multivariate analysis of variance (PERMANOVA) using the  
187 *adonis* function in the R Statistics Package R version 3.0.2 (R Development Core Team 2015).  
188 PERMANOVA was also used to assess the contribution of soil factors to the variation in  
189 bacterial community composition. The  $R^2$  value reported refers to the treatment sums of squares  
190 divided by the total sums of squares for each soil factor in the model. Because the *adonis*  
191 function carries out sequential tests (similar to Type I sums of squares) (39), the effect of the last  
192 soil factor or soil biological activity factor of the model was included in the final PERMANOVA  
193 model summary (40). We also performed multiple linear regression (gene abundance ~ crop  
194 number + total soil carbon + soil moisture + soil ammonium + soil nitrate) to test the influence  
195 of soil factors and crop diversity number on abundance of disease suppression/biocontrol gene  
196 *prnD* using the *lm* function in the R Statistics Package R version 3.0.2 (R Core Development  
197 Team 2015).

198

## 199 **RESULTS**

### 200 **Bacterial community composition along a crop diversity gradient**

201 A total of 12,539,359 sequence reads were generated, and we analyzed 24,858 OTUs for  
202 bacterial community patterns. A summary of soil attributes is presented in Table S1 and reported  
203 in McDaniel et al. (2014) (41). The crop diversity treatment significantly influenced bacterial  
204 community composition (PERMANOVA, crop rotation:  $R^2 = 0.38$ ,  $P < 0.001$ ; Table 2a, Fig. 1,  
205 S1). Bacterial communities from the fallow plots and the longest crop rotations (CSW, CSW-  
206 1cov, CSW-2cov) were more similar to each other than the lower crop diversity treatments (C-  
207 1cov, CS) (Fig. 1). The monoculture corn (C) treatment was more distinct in bacterial

208 community composition than all other crop diversity treatments (Fig. 1). Bacterial diversity was  
209 significantly higher under lower crop diversity and fallow treatments (Fig. 2). In addition,  
210 percent sand, a soil texture factor, was the only soil property to significantly explain bacterial  
211 community variation (PERMANOVA, Sand:  $R^2 = 0.063$ ,  $P = 0.044$ , Table 3a). Potentially  
212 mineralizable nitrogen, which represents the biologically available nitrogen pool, explained  
213 variation in bacterial community composition (PERMANOVA, PMN:  $R^2 = 0.085$ ,  $P = 0.013$ ,  
214 Table 3b).

215

### 216 **Disease suppression functional potential in soils along a crop diversity**

217 Crop diversity affected the composition of disease suppression soil microorganisms. We  
218 observed a significant shift in disease suppression community composition (represented by *phlD*  
219 gene T-RFLP) along the crop diversity gradient (PERMANOVA; crop rotation:  $R^2 = 0.52$ ,  $P =$   
220  $0.037$ ; Fig. 3, Table 2b). The *phlD* community composition in the fallow treatment was different  
221 from other cropping systems (Fig. 2). The relative abundance of dominant T-RF 280 bp fragment  
222 group accounted for about 70% of the disease suppressive community under fallow conditions.  
223 In addition, the disease suppressive functional group T-RF 582 bp was a dominant group,  
224 representing about 31-97% relative abundance across all crop diversity treatments. In addition,  
225 *prnD* gene abundances in cropping systems were higher than under fallow conditions (Fig. 3). In  
226 cropping systems, the *prnD* gene in CSW-2cov treatment was the most abundant, and the gene  
227 abundance was significantly higher than in CSW and fallow treatments (Fig. 3). The *prnD* gene  
228 abundance results suggest CSW2cov>CSW1cov>CSW and C1cov>C, which indicated that the  
229 treatments with cover crop tended to increase the *prnD* gene abundance (Fig. 3). When crop  
230 input is removed, such as in the fallow treatment, *prnD* gene abundance was significantly

231 decreased (Fig. 4). Based on multiple linear regression analysis, plant and soil factors  
232 significantly influenced *prnD* abundance (Adjusted  $R^2 = 0.398$ ,  $F = 4.571$ ,  $P = 0.005$ ). Crop  
233 species number ( $P = 0.003$ ), soil carbon ( $P = 0.002$ ), and soil moisture ( $P = 0.0005$ ) significantly  
234 influenced *prnD* gene abundance (Table 4).

235

## 236 **DISCUSSION**

### 237 **Crop diversity and disease suppression function relationship**

238 Crop rotation history impacts bacterial diversity and disease suppression potential in  
239 soils. Our findings support the hypothesis that crop diversity influences bacterial community  
240 composition and disease suppression potential in soils. Plants provide carbon to the soil  
241 environment through root exudation of recently assimilated photosynthate, composed of soluble,  
242 low molecular weight organic compounds (42). As a consequence, the increased C flow from  
243 root exudates can stimulate soil microbial activity. Changes in plant inputs through variation in  
244 root exudation are related to the crop species in the rotation. Changes in root exudates have been  
245 observed to shift microbial community composition and stimulate a diverse microbial  
246 community (18-21). Specifically, our results revealed that taxonomic diversity decreased while  
247 functional diversity increased in response to increasing crop diversity. The addition of cover  
248 crops in rotation increased disease suppressive potential. Crop diversity influenced the subset of  
249 microbes associated with disease suppression of soil-borne pathogens. In previous studies,  
250 interactions among the total microbial community and soil-borne pathogens in the plant  
251 rhizosphere have influenced both plant growth and productivity (27, 43). Our results suggest that  
252 plant diversity can enhance protection against soil-borne pathogens by fostering antagonistic soil  
253 bacterial communities (25).

254

## 255 **Crop rotation effects on DAPG and PRN producers**

256       The gene abundance results suggest that incorporation of cover crop in rotations increases  
257 *prnD* gene abundance. Specifically, cover crop species may have important effects on the *prnD*  
258 gene abundance and disease suppressive functional potential in soils. The *prnD* gene abundance  
259 in cropping systems is higher than in fallow treatment. In addition, there are no reports linking  
260 the functional group T-RF 280 to a specific genotype of laboratory strains (38). In our study, this  
261 bacterial group is capable of producing 2,4-diacetylphloroglucinol (DAPG) and affects DAPG  
262 community composition (Fig. 3). The T-RF 582 bp was also reported to be a major 2,4-  
263 diacetylphloroglucinol-producing functional *Pseudomonas kilonensis* in a previous study (38).  
264 The abundance of DAPG and PRN producers increasing with plant diversity has been previously  
265 observed (25). Compared to agricultural soils, the PRN producers were more frequently detected  
266 in grassland or grassland-derived plots (23, 24). The PRN gene abundance increased in the  
267 presence of grasses, but the legume species tended to decrease the DAPG and PRN producer  
268 abundance (25). Together, our findings combined with previous studies suggest that the land-use  
269 regime, plant diversity, and plant species are involved in structuring disease suppressive  
270 microbial communities.

271

## 272 **Testing the biodiversity-ecosystem function relationship**

273       A framework to investigate biodiversity and ecosystem functioning includes four main  
274 components: species composition, species abundance, functional traits possessed by each  
275 species, and ecosystem function to measure in response to changes in biodiversity (44).  
276 Microbial systems are ideal for addressing biodiversity and ecosystem functioning relationships

277 within this framework (45). In our study, higher crop diversity but lower soil bacterial diversity  
278 supported disease suppression functional potential in soils. We posit that rotation has a filtering  
279 effect on soil microbes, whereby crop diversity selects for antagonistic microbes with disease  
280 suppressive potential. Our study further supports the hypothesis that plant diversity can support  
281 biocontrol functional potential by enhancing antagonistic properties of resident soil microbes  
282 against soil-borne pathogens. The soil microbial community composition may be more important  
283 than soil microbial diversity to soil ecological function. Increasing evidence supports that crop  
284 species and soil type have been shown to shape the soil microbial composition and function (2,  
285 3); thus, land management can have a large effect on soil microbial processes and microbial  
286 community composition (46-48).

287

## 288 **Conclusion**

289 Here, we demonstrate that crop diversity influenced bacterial community composition  
290 and disease suppressive functional potential in soils. Higher disease suppressive potential is  
291 supported when crop rotations are longer and more complex. Plants and microbes drive nutrient  
292 cycling in this long-term cropping diversity since no other synthetic or organic amendments are  
293 applied. In our study, once crop species were removed (fallow), disease suppressive potential  
294 dramatically decreased. Managing for enhanced disease suppressive soils remains challenging to  
295 implement given the complex plant-soil-microbial interactions occurring in agricultural soils.  
296 However, the legacy effects associated with crop diversity have potential to be diluted by  
297 changes in management when fields are not actively in agricultural production (e.g., fallow plots  
298 no longer planted with crops).

299

300 **FUNDING INFORMATION**

301 USDA NIFA (#2012-67012-19845 to A.L.P.); NSF (#1442246 to J.T.L.)

302 The funders had no role in study design, data collection and interpretation, preparation of the  
303 manuscript, or decision to submit the work for publication.

304

305 **ACKNOWLEDGEMENTS**

306 This work was supported by the U.S. Department of Agriculture National Institute of Food and  
307 Agriculture Postdoctoral Fellowship (2012-67012-19845 to A.L.P.) and the National Science  
308 Foundation (1442246 to J.T.L.). Support was also provided by the NSF Long-term Ecological  
309 Research Program (DEB 1027253) at the Kellogg Biological Station and by Michigan State  
310 University AgBioResearch. We would like to thank the Kellogg Biological Station LTER for  
311 logistical support and use of sampling sites. We also thank M. Muscarella, J. Ford, S. Krahnke,  
312 and M. Brewer for microbial analyses support and B. O'Neill, M. McDaniel, A.S. Grandy and  
313 T.M. Schmidt Labs for field and soil analyses support.

314

315 **REFERENCES**

- 316 1. **Tilman D, Cassman KG, Matson PA, Naylor R, Polasky S.** 2002. Agricultural  
317 sustainability and intensive production practices. *Nature* **418**:671-677.
- 318 2. **McDaniel MD, Tiemann LK, Grandy AS.** 2013. Does agricultural crop diversity  
319 enhance soil microbial biomass and organic matter dynamics? A meta-analysis. *Ecol*  
320 *Appl* **24**:560-570.
- 321 3. **Tiemann LK, Grandy AS, Atkinson EE, Marin-Spiotta E, McDaniel MD.** 2015. Crop  
322 rotational diversity enhances belowground communities and functions in an  
323 agroecosystem. *Ecol Lett* **18**:761-771.

- 324 4. **Postma J, Schilder MT, Bloem J, van Leeuwen-Haagsma WK.** 2008. Soil  
325 suppressiveness and functional diversity of the soilmicroflora in organic farming systems.  
326 *Soil Biol Biochem* **40**:2394–2406.
- 327 5. **Smukler SM, Sanchez-Moreno S, Fonte SJ, Ferris H, Klonsky K, O'Geen AT, Scow**  
328 **KM, Steenwerth KL, Jackson LE.** 2010. Biodiversity and multiple ecosystem functions  
329 in an organic farmscape. *Agr Ecosyst Environ* **139**:80-97.
- 330 6. **Swift MJ, Izac AMN, van Noordwijk M.** 2004. Biodiversity and ecosystem services in  
331 agricultural landscapes - are we asking the right questions? *Agr Ecosyst Environ*  
332 **104**:113-134.
- 333 7. **Young-Mathews A, Culman SW, Sánchez-Moreno S, O'Geen AT, Ferris H,**  
334 **Hollander AD, Jackson LE.** 2010. Plant-soil biodiversity relationships and nutrient  
335 retention in agricultural riparian zones of the Sacramento Valley, California. *Agroforest*  
336 *Syst* **80**:41-60.
- 337 8. **Letourneau DK, Bothwell SG.** 2008. Comparison of organic and conventional farms:  
338 challenging ecologists to make biodiversity functional. *Front Ecol Environ* **6**:430-438.
- 339 9. **Letourneau DK, van Bruggen A.** 2006. Crop protection in organic agriculture. *In*  
340 Kirstiansen P, Taji A, Reganold J (ed), *Organic Agriculture: A Gobal Perspective*.  
341 CSIRO Publishing, Collingwood, Australia.
- 342 10. **Barness E, Chen Y, Hadar Y, Marschner H, Romheld V.** 1991. Siderophores of  
343 *Pseudomonas putida* as an iron source for dicot and monocot plants. *Plant Soil* **130**:231-  
344 241.
- 345 11. **Reed SC, Townsend AR, Cleveland CC, Nemergut DR.** 2010. Microbial community  
346 shifts influence patterns in tropical forest nitrogen fixation. *Oecologia* **164**:521-531.

- 347 12. **Lugtenberg B, Kamilova F.** 2009. Plant-growth-promoting rhizobacteria. *Annu Rev*  
348 *Microbiol* **63**:541–545.
- 349 13. **Bever JD, Westover KM, Antonovics J.** 1997. Incorporating the soil community into  
350 plant population dynamics: the utility of the feedback approach. *J Ecol* **85**:561-573.
- 351 14. **Haas D, Defago G.** 2005. Biological control of soil-borne pathogens by fluorescent  
352 pseudomonads. *Nature Rev Microbiol* **3**:307-319.
- 353 15. **Perez C, Dill-Macky R, Kinkel LL.** 2008. Management of soil microbial communities  
354 to enhance populations of *Fusarium graminearum*-antagonists in soil. *Plant Soil* **302**:53-  
355 69.
- 356 16. **Kulmatiski A, Beard KH, Stevens JR, Cobbold SM.** 2008. Plant–soil feedbacks: a  
357 meta-analytical review. *Ecol Lett* **11**:980–992.
- 358 17. **Reynolds HL, Packer A, Bever JD, Clay K.** 2003. Grassroots ecology: Plant-microbe-  
359 soil interactions as drivers of plant community structure and dynamics. *Ecology* **84**:2281-  
360 2291.
- 361 18. **Dijkstra FA, Morgan JA, Blumenthal D, Follett RF.** 2010. Water limitation and plant  
362 inter-specific competition reduce rhizosphere-induced C decomposition and plant N  
363 uptake. *Soil Biol Biochem* **42**:1073-1082.
- 364 19. **Hooper DU, Bignell DE, Brown VK, Brussaard L, Dangerfield JM, Wall DH,**  
365 **Wardle DA, Coleman DC, Giller KE, Lavelle P, Van der Putten WH, De Ruiter PC,**  
366 **Rusek J, Silver WL, Tiedje JM, Wolters V.** 2000. Interactions between aboveground  
367 and belowground biodiversity in terrestrial ecosystems: Patterns, mechanisms, and  
368 feedbacks. *Bioscience* **50**:1049-1061.



- 369 20. **Paterson E, Midwood AJ, Millard P.** 2009. Through the eye of the needle: a review of  
370 isotope approaches to quantify microbial processes mediating soil carbon balance. *New*  
371 *Phytol* **184**:19-33.
- 372 21. **Stephan A, Meyer AH, Schmid B.** 2000. Plant diversity affects culturable soil bacteria  
373 in experimental grassland communities. *J Ecol* **88**:988-998.
- 374 22. **Weller DM, Raaijmakers JM, Gardener BBM, Thomashow LS.** 2002. Microbial  
375 populations responsible for specific soil suppressiveness to plant pathogens. *Annu Rev*  
376 *Phytopathol* **40**:309-+.
- 377 23. **Garbeva P, van Veen JA, van Elsas JD.** 2004. Microbial diversity in soil: Selection of  
378 microbial populations by plant and soil type and implications for disease suppressiveness.  
379 *Annu Rev Phytopathol* **42**:243-270.
- 380 24. **Garbeva P, Voesenek K, van Elsas JD.** 2004. Quantitative detection and diversity of  
381 the pyrrolnitrin biosynthetic locus in soil under different treatments. *Soil Biol Biochem*  
382 **36**:1453-1463.
- 383 25. **Latz E, Eisenhauer N, Rall BC, Roscher C, Scheu S, Jousset A.** 2012. Plant diversity  
384 improves protection against soil-borne pathogens by fostering antagonistic bacterial  
385 communities. *J Ecol* **100**:597-604.
- 386 26. **Wiggins E, Kinkel LL.** 2005. Green manures and crop sequences influence alfalfa root  
387 rot and pathogen inhibitory activity among soil-borne streptomycetes. *Plant Soil*  
388 **268**:271-283.
- 389 27. **Bakker MG, Glover JD, Mai JG, Kinkel LL.** 2010. Plant community effects on the  
390 diversity and pathogen suppressive activity of soil streptomycetes. *Applied Soil Ecology*  
391 **46**:35-42.

- 392 28. **Kulmatiski A, Beard KH.** 2011. Long-term plant growth legacies overwhelm short-term  
393 plant growth effects on soil microbial community structure. *Soil Biol Biochem* **43**:823-  
394 830.
- 395 29. **Crum JR, Collins HP.** 1995. KBS Soils [Online].  
396 <http://www.lter.kbs.msu.edu/soil/characterization>. Accessed
- 397 30. **Smith RG, Gross KL.** 2006. Weed community and corn yield variability in diverse  
398 management systems. *Weed Sci* **54**:106-113.
- 399 31. **Caporaso JG, Lauber CL, Walters WA, Berg-Lyons D, Huntley J, Fierer N, Owens**  
400 **SM, Betley J, Fraser L, Bauer M, Gormley N, Gilbert JA, Smith G, Knight R.** 2012.  
401 Ultra-high-throughput microbial community analysis on the Illumina HiSeq and MiSeq  
402 platforms. *ISME J* **6**:1621-1624.
- 403 32. **Muscarella M, Bird K, Larsen M, Placella S, Lennon J.** 2014. Phosphorus resource  
404 heterogeneity in microbial food webs. *Aquat Microb Ecol* **73**:259-272.
- 405 33. **Needleman SB, Wunsch CD.** 1970. A general method applicable to the search for  
406 similarities in the amino acid sequence of two proteins. *J Mol Biol* **48**:443-453.
- 407 34. **Edgar RC, Haas BJ, Clemente JC, Quince C, Knight R.** 2011. UCHIME improves  
408 sensitivity and speed of chimera detection. *Bioinformatics* **27**:2194-2200.
- 409 35. **Yilmaz P, Parfrey LW, Yarza P, Gerken J, Pruesse E, Quast C, Schweer T, Peplies**  
410 **J, Ludwig W, Glöckner FO.** 2013. The SILVA and “All-species living tree project  
411 (LTP)” taxonomic frameworks. *Nucl Acids Res* **42**:D643-D648.
- 412 36. **Kozich JJ, Westcott SL, Baxter NT, Highlander SK, Schloss PD.** 2013. Development  
413 of a dual-index sequencing strategy and curation pipeline for analyzing amplicon

- 414 sequence data on the MiSeq Illumina sequencing platform. *Appl Environ Microbiol*  
415 **79**:5112-5120.
- 416 37. **Schloss PD, Westcott SL, Ryabin T, Hall JR, Hartmann M, Hollister EB,**  
417 **Lesniewski RA, Oakley BB, Parks DH, Robinson CJ, Sahl JW, Stres B, Thallinger**  
418 **GG, Van Horn DJ, Weber CF.** 2009. Introducing mothur: Open-Source, Platform-  
419 Independent, Community-Supported Software for Describing and Comparing Microbial  
420 Communities. *Appl Environ Microbiol* **75**:7537-7541.
- 421 38. **von Felten A, Meyer JB, Defago G, Maurhofer M.** 2011. Novel T-RFLP method to  
422 investigate six main groups of 2,4-diacetylphloroglucinol-producing pseudomonads in  
423 environmental samples. *J Microbiol Methods* **84**:379-387.
- 424 39. **Oksanen J, Blanchet FG, Kindt R, Legendre P, O'Hara RB, Simpson GL, Solymos**  
425 **P, Stevens MHH, Wagner H.** 2010. Community Ecology Package 'vegan'.
- 426 40. **Peralta AL, Matthews JW, Flanagan DN, Kent AD.** 2012. Environmental Factors at  
427 Dissimilar Spatial Scales Influence Plant and Microbial Communities in Restored  
428 Wetlands. *Wetlands* **32**:1125-1134.
- 429 41. **McDaniel MD, Grandy AS, Tiemann LK, Weintraub MN.** 2014. Crop rotation  
430 complexity regulates the decomposition of high and low quality residues. *Soil Biol*  
431 *Biochem* **78**:243-254.
- 432 42. **Neumann G, Romheld V.** 2007. The Release of Root Exudates as Affects by the Plant  
433 Physiological Status, p 23-72. *In* Pinton R, Varanini Z, Nannipieri P (ed), *The*  
434 *Rhizosphere: Biochemistry and Organic Substances at the Soil-plant Interface*, 2nd ed.  
435 CRC Press.

- 436 43. **Penton CR, Gupta V, Tiedje JM, Neate SM, Ophel-Keller K, Gillings M, Harvey P,**  
437 **Pham A, Roget DK.** 2014. Fungal community structure in disease suppressive soils  
438 assessed by 28S LSU gene sequencing. *PloS One* **9**:e93893.
- 439 44. **Naeem S, Wright JP.** 2003. Disentangling biodiversity effects on ecosystem  
440 functioning: Deriving solutions to a seemingly insurmountable problem. *Ecol Lett* **6**:567-  
441 579.
- 442 45. **Jessup CM, Kassen R, Forde SE, Kerr B, Buckling A, Rainey PB, Bohannan BJM.**  
443 2004. Big questions, small worlds: microbial model systems in ecology. *Trends Ecol*  
444 *Evol* **19**:189-197.
- 445 46. **Jangid K, Williams MA, Franzluebbers AJ, Sanderlin JS, Reeves JH, Jenkins MB,**  
446 **Endale DM, Coleman DC, Whitman WB.** 2008. Relative impacts of land-use,  
447 management intensity and fertilization upon soil microbial community structure in  
448 agricultural systems. *Soil Biol Biochem* **40**:2843-2853.
- 449 47. **Lauber CL, Strickland MS, Bradford MA, Fierer N.** 2008. The influence of soil  
450 properties on the structure of bacterial and fungal communities across land-use types.  
451 *Soil Biol Biochem* **40**:2407-2415.
- 452 48. **Orr C, Stewart C, Leifert C, Cooper J, Cummings S.** 2015. Effect of crop  
453 management and sample year on abundance of soil bacterial communities in organic and  
454 conventional cropping systems. *J Appl Microbiol.*  
455  
456  
457  
458

459 **TABLES**

460 Table 1. Cropping diversity treatments at the Kellogg Biological Station Long-term Ecological  
461 Research (KBS LTER) Biodiversity Gradient Experiment Plots. Plant treatments were  
462 established in 2000. Treatments were composed of monoculture, two-crop rotation, three-crop  
463 rotation +/- cover crops, and fallow plots (early successional) and soil collected during the corn  
464 phase of the rotation. Treatment abbreviations are in parentheses.

465

| <b>Crop diversity treatment description</b>         | <b>Number of crop species</b> |
|-----------------------------------------------------|-------------------------------|
| (1) Continuous monoculture (C)                      | 1                             |
| (2) Continuous monoculture, one cover crop (C-1cov) | 2                             |
| (3) Two-crop rotation (CS)                          | 2                             |
| (4) Three-crop rotation (CSW)                       | 3                             |
| (5) Three-crop rotation, one cover crop (CSW-1cov)  | 4                             |
| (6) Three-crop rotation, two cover crops (CSW-2cov) | 5                             |
| (7) Spring Fallow/early successional field (fallow) | 10                            |

466

467

468

469

470

471

472

473

474 Table 2. Effects of crop rotation on the composition of bacterial community composition and  
475 disease suppressive community composition. Summary of the contribution of crop rotation (i.e.,  
476 crop diversity) on (A) bacterial community variation based on 16S rRNA amplicon sequencing  
477 or (b) disease suppressive community variation based on *phlD* gene T-RFLP at the KBS  
478 Biodiversity Gradient Experimental Plots based on permutational MANOVA (PERMANOVA)  
479 results. Rotation effect was considered to significantly contribute to community variation at  $P <$   
480 0.05.

481

(A) 16S rRNA

|           | df | SS    | MS    | <i>F</i> | $R^2$ | <i>P</i> -value |
|-----------|----|-------|-------|----------|-------|-----------------|
| Rotation  | 6  | 0.321 | 0.054 | 2.135    | 0.379 | <0.001          |
| Residuals | 21 | 0.527 | 0.025 | 0.621    |       |                 |
| Total     | 27 | 0.848 | 1.000 |          |       |                 |

(B) *phlD* gene

|           | df | SS    | MS    | <i>F</i> | $R^2$ | <i>P</i> -value |
|-----------|----|-------|-------|----------|-------|-----------------|
| Rotation  | 8  | 3.024 | 0.378 | 1.748    | 0.518 | 0.037           |
| Residuals | 13 | 2.811 | 0.216 | 0.482    |       |                 |
| Total     | 21 | 5.835 | 1.000 |          |       |                 |

482

483

484

485

486

487 Table 3. Summary of the contribution of (A) soil factors and (B) soil biological activity on  
488 bacterial community variation at the KBS Biodiversity Gradient Experimental Plots based on  
489 permutational MANOVA (PERMANOVA). Soil factor effects were considered to significantly  
490 contribute to community variation at  $P < 0.05$ .

491 (A) Soil Factors

| Effect    | df | SS    | MS    | <i>F</i> | <i>R</i> <sup>2</sup> | <i>P</i> -value |
|-----------|----|-------|-------|----------|-----------------------|-----------------|
| Sand      | 1  | 0.053 | 0.053 | 2.042    | 0.063                 | 0.044           |
| Silt      | 1  | 0.052 | 0.052 | 2.003    | 0.061                 | 0.056           |
| Clay      | 1  | 0.051 | 0.051 | 1.961    | 0.060                 | 0.064           |
| pH        | 1  | 0.024 | 0.024 | 0.915    | 0.028                 | 0.513           |
| Nitrate   | 1  | 0.010 | 0.010 | 0.385    | 0.012                 | 0.982           |
| Ammonium  | 1  | 0.009 | 0.009 | 0.345    | 0.011                 | 0.981           |
| Nitrogen  | 1  | 0.028 | 0.028 | 1.061    | 0.033                 | 0.369           |
| Carbon    | 1  | 0.013 | 0.013 | 0.501    | 0.015                 | 0.902           |
| Moisture  | 1  | 0.039 | 0.039 | 1.481    | 0.045                 | 0.145           |
| Residuals | 18 | 0.469 | 0.026 |          | 0.553                 |                 |
| Total     | 27 | 0.848 |       |          | 1.000                 |                 |

492

493

494

495

496

497

498 (B) Soil Biological Activity

| Effect    | df | SS    | MS    | <i>F</i> | <i>R</i> <sup>2</sup> | <i>P</i> -value |
|-----------|----|-------|-------|----------|-----------------------|-----------------|
| PMN       | 1  | 0.072 | 0.072 | 2.485    | 0.085                 | 0.013           |
| PMC       | 1  | 0.038 | 0.038 | 1.314    | 0.045                 | 0.211           |
| POXC      | 1  | 0.050 | 0.050 | 1.715    | 0.059                 | 0.104           |
| Residuals | 24 | 0.698 | 0.029 |          | 0.823                 |                 |
| Total     | 27 | 0.848 |       |          | 1.000                 |                 |

499

500

501

502

503

504

505

506

507

508

509

510

511

512

513



514 Table 4. Summary of multiple linear regression to test the influence of disease suppressive  
515 functional potential (*prnD* gene abundance) on soil factors and crop diversity.

516

| Factor      | Estimate | Std error | t-value | p-value |
|-------------|----------|-----------|---------|---------|
| Intercept   | 7.444    | 0.420     | 17.728  | < 0.001 |
| Crop_number | -0.085   | 0.025     | -3.355  | 0.003   |
| Carbon      | 0.180    | 0.050     | 3.618   | 0.002   |
| Moisture    | -11.564  | 2.817     | -4.105  | < 0.001 |
| Ammonium    | -0.701   | 0.948     | -0.739  | 0.468   |
| Nitrate     | 0.093    | 0.136     | 0.684   | 0.501   |

517

518

519

520

521

522

523

524

525

526

527

528

529

530 **FIGURES**

531

532 Figure 1. Ordination from Principal Coordinates Analysis depicting soil bacterial communities  
533 along a cropping diversity gradient. Symbols are colored according to cropping diversity  
534 treatment (C=continuous corn; C-1cov=corn/1 cover crop; CS=corn/soy; CSW=corn/soy/wheat;  
535 CSW-1cov=corn/soy/wheat/1 cover crop; CSW-2cov=corn/soy/wheat/2 cover crops;  
536 fallow=spring fallow, tilled annually).

537

538 Figure 2. The bacterial diversity (mean  $\pm$  SEM based on Shannon Diversity Index  $H'$ ) in  
539 response to long-term crop diversity treatment. Different letters above points reflect significant  
540 differences in gene abundance along crop diversity gradient at  $P < 0.05$  (Tukey's HSD *post-hoc*  
541 analysis).

542

543 Figure 3. Ordination from Principal Coordinates Analysis of disease suppressive community  
544 based on T-RFLP of *phlD* gene (DAPG producers) T-RF relative abundance data obtained from  
545 different cropping system treatments.

546

547 Figure 4. Abundance of *prnD* gene (PRN producers) in response to crop diversity treatment  
548 analyzed using quantitative PCR and expressed as log copy number of *prnD* gene. Different  
549 letters above points reflect significant differences in Different letters above boxplots considered  
550 significantly different in gene abundance at  $P < 0.05$  (Tukey's HSD *post-hoc* analysis).

551

552

553 Figure 1

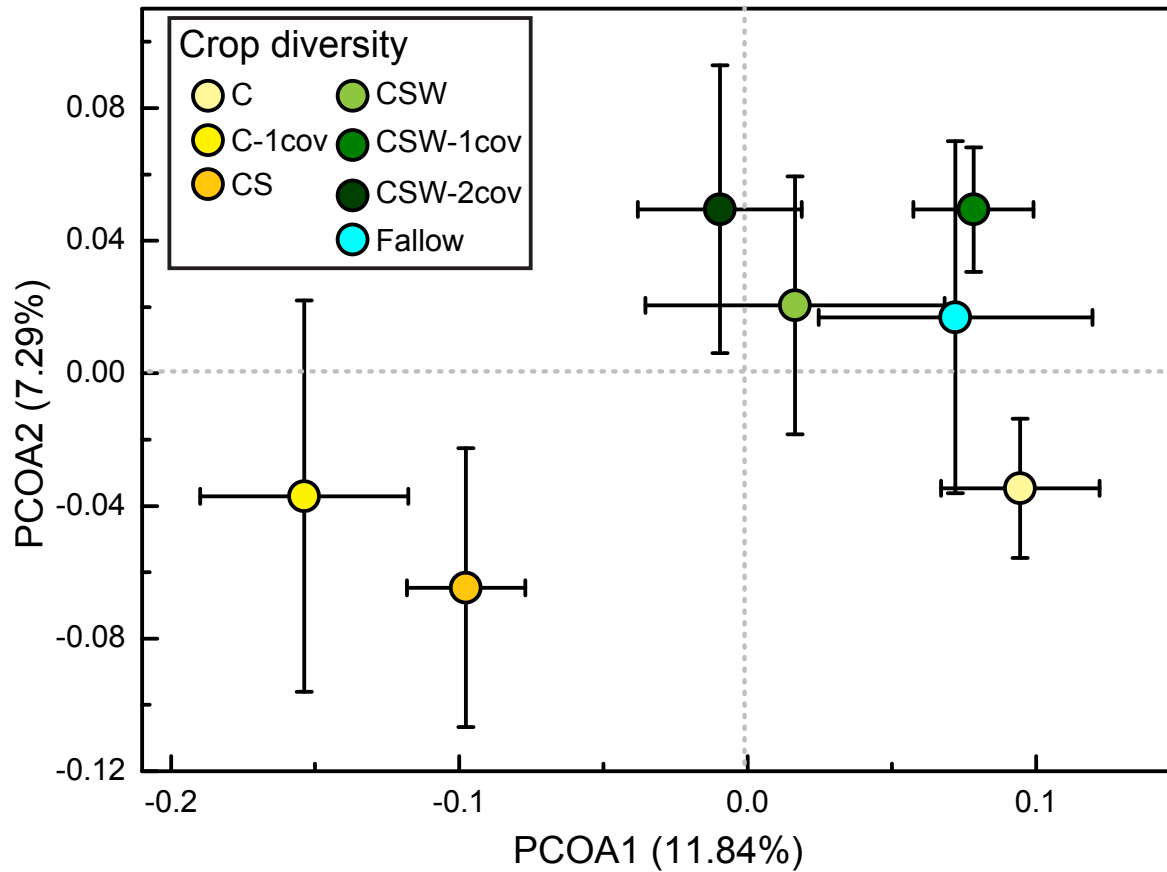

554

555 Figure 1. Ordination from Principal Coordinates Analysis depicting soil bacterial communities  
556 along a cropping diversity gradient. Symbols are colored according to cropping diversity  
557 treatment (C=continuous corn; C-1cov=corn/1 cover crop; CS=corn/soy; CSW=corn/soy/wheat;  
558 CSW-1cov=corn/soy/wheat/1 cover crop; CSW-2cov=corn/soy/wheat/2 cover crops;  
559 fallow=spring fallow, tilled annually).

560

561

562

563

564

565 Figure 2

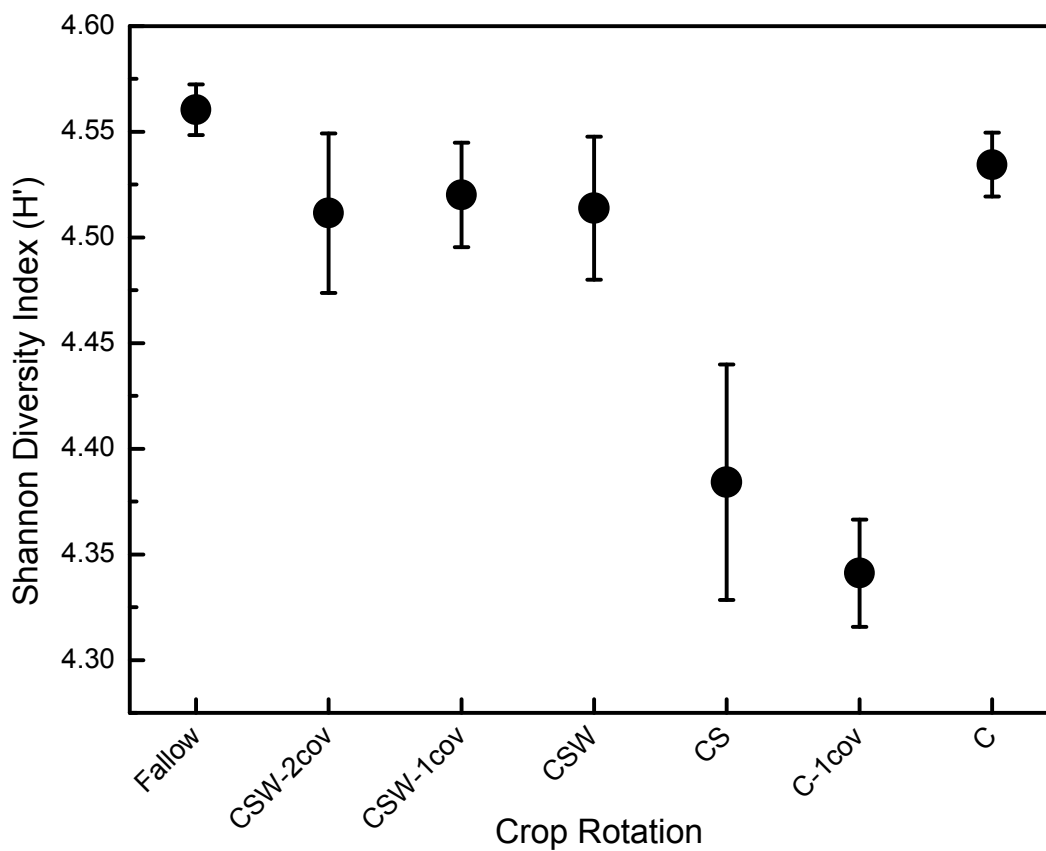

566

567 Figure 2. The bacterial diversity (mean  $\pm$  SEM based on Shannon Diversity Index  $H'$ ) in  
568 response to long-term crop diversity treatment. Different letters above points reflect significant  
569 differences in gene abundance along crop diversity gradient at  $P < 0.05$  (Tukey's HSD *post-hoc*  
570 analysis).

571

572

573

574

575

576

577 Figure 3

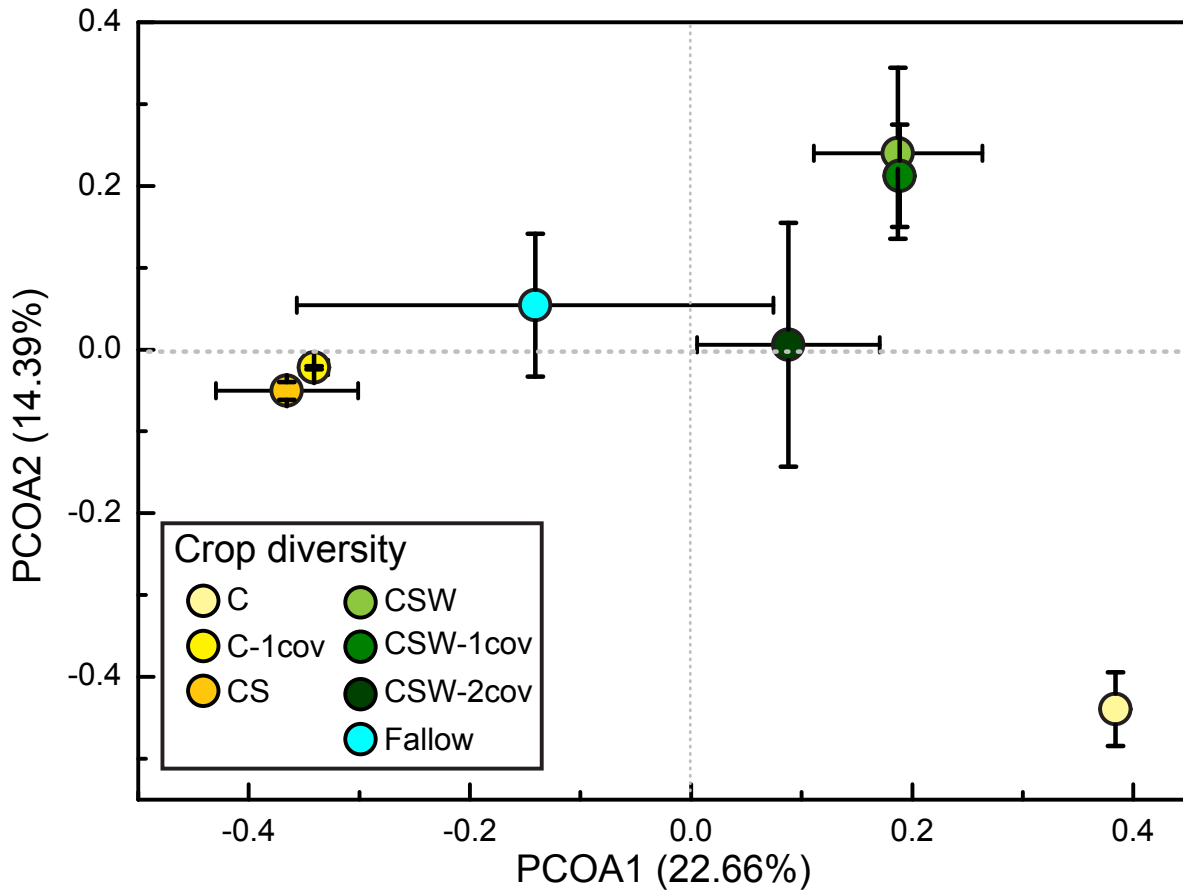

578

579 Figure 3. Ordination from Principal Coordinates Analysis of disease suppressive community  
580 based on T-RFLP of *phlD* gene (DAPG producers) T-RF relative abundance data obtained from  
581 different cropping system treatments.

582

583

584

585

586

587

588

589 Figure 4

590

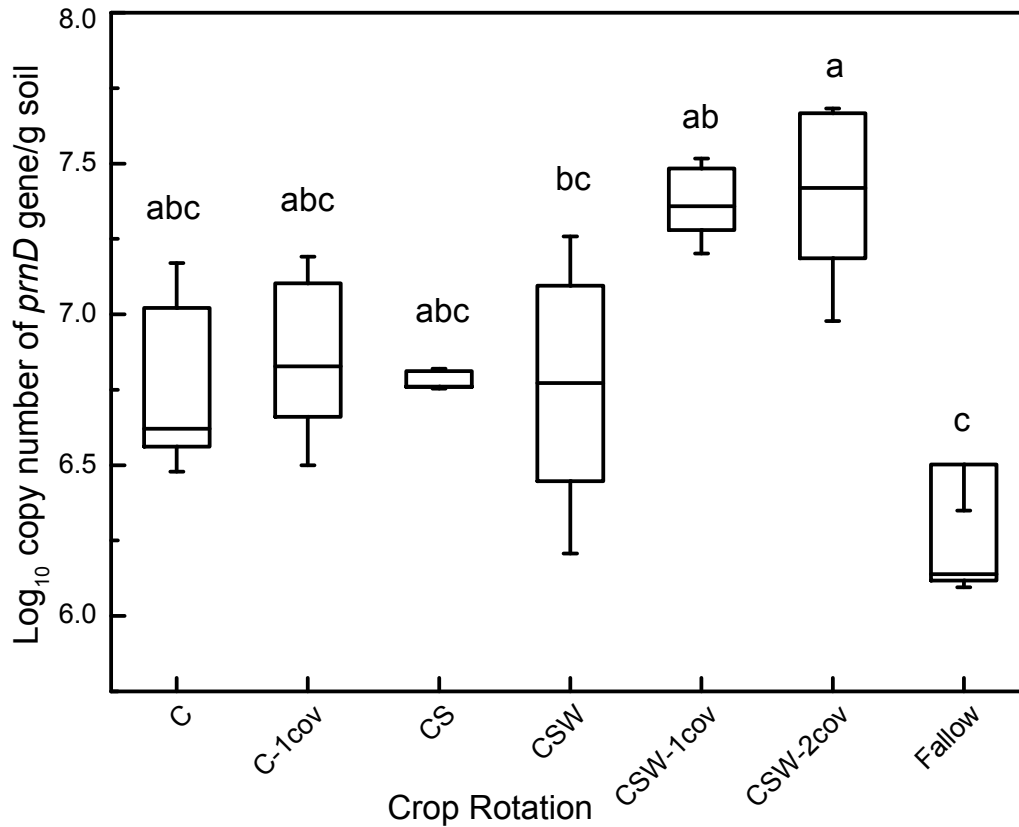

591

592 Figure 4. Abundance of *prnD* gene (PRN producers) in response to crop diversity treatment  
593 analyzed using quantitative PCR and expressed as log copy number of *prnD* gene. Different  
594 letters above points reflect significant differences in Different letters above boxplots considered  
595 significantly different in gene abundance at  $P < 0.05$  (Tukey's HSD *post-hoc* analysis).

596

597

598

599

600

601 SUPPLEMENTAL

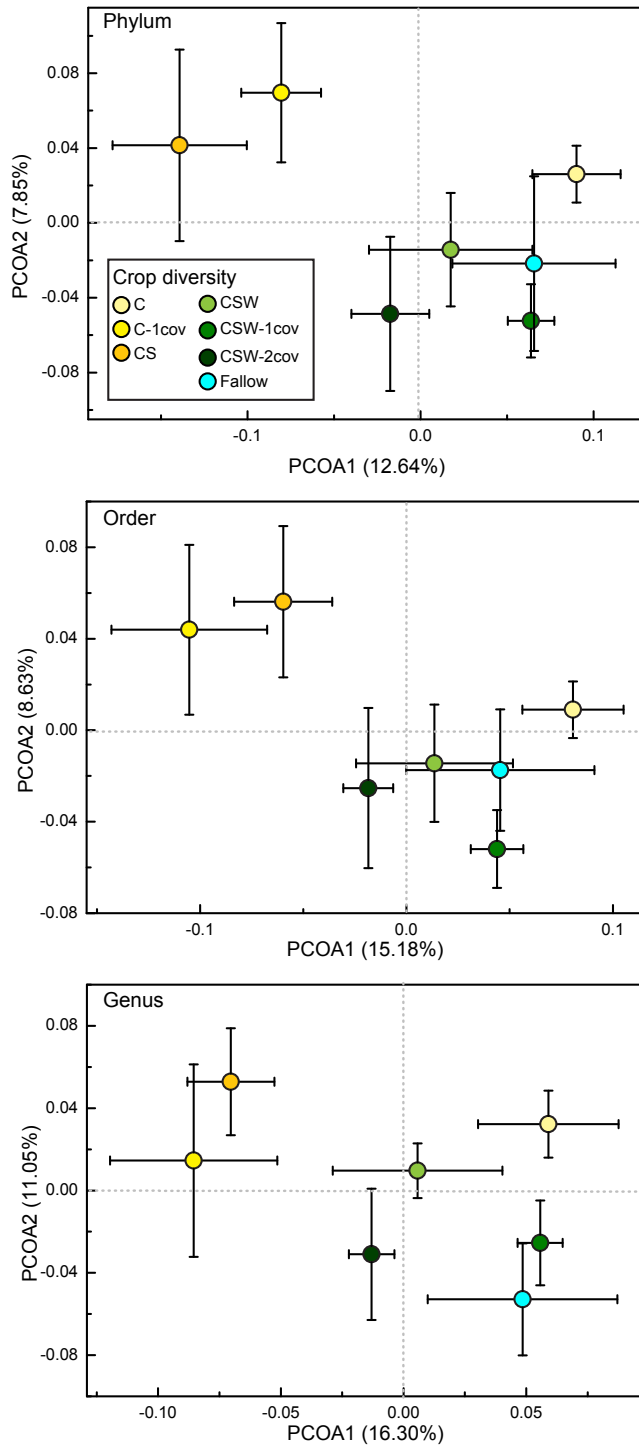

602

603 Figure S1. Principal coordinates analysis plot of classified only 16S rRNA sequences based on

604 relative abundance of classified OTUs at the phylum, order, and genus levels.

603 **SUPPLEMENTAL**

604

605 Table S1. Soil properties measured along the KBS cropping diversity gradient averaged over four replicate blocks. Comparison of soil  
 606 properties and biological activity results are summarized in M.D. McDaniel et al. (2014) (41).

607

| Treatment | Total C<br>(g C kg <sup>-1</sup> soil) | Total N<br>(g N kg <sup>-1</sup> soil) | NH <sub>4</sub> <sup>+</sup><br>(mg N kg <sup>-1</sup> soil) | NO <sub>3</sub> <sup>-</sup><br>(mg N kg <sup>-1</sup> soil) | pH          | Clay<br>(%) | Silt<br>(%) | Sand<br>(%) |
|-----------|----------------------------------------|----------------------------------------|--------------------------------------------------------------|--------------------------------------------------------------|-------------|-------------|-------------|-------------|
| Fallow    | 8.74 ± 2.41                            | 0.77 ± 0.16                            | 0.07 ± 0.04                                                  | 1.50 ± 0.31                                                  | 6.70 ± 0.28 | 25 ± 9      | 39 ± 19     | 36 ± 11     |
| CSW-2cov  | 8.98 ± 1.81                            | 0.91 ± 0.12                            | 0.09 ± 0.04                                                  | 1.24 ± 0.50                                                  | 6.25 ± 0.11 | 21 ± 10     | 51 ± 22     | 29 ± 12     |
| CSW-1cov  | 9.63 ± 1.29                            | 0.91 ± 0.04                            | 0.06 ± 0.02                                                  | 1.09 ± 0.51                                                  | 6.37 ± 0.25 | 24 ± 10     | 46 ± 17     | 31 ± 7      |
| CSW       | 7.43 ± 1.58                            | 0.70 ± 0.10                            | 0.07 ± 0.03                                                  | 1.26 ± 0.62                                                  | 6.54 ± 0.21 | 21 ± 10     | 45 ± 21     | 34 ± 12     |
| CS        | 7.70 ± 2.11                            | 0.73 ± 0.26                            | 0.10 ± 0.09                                                  | 1.16 ± 0.74                                                  | 6.66 ± 0.12 | 23 ± 11     | 41 ± 24     | 36 ± 14     |
| C-1cov    | 9.09 ± 1.86                            | 0.93 ± 0.16                            | 0.06 ± 0.02                                                  | 1.50 ± 0.65                                                  | 6.46 ± 0.25 | 27 ± 8      | 36 ± 19     | 38 ± 12     |
| C         | 8.09 ± 1.24                            | 0.71 ± 0.15                            | 0.16 ± 0.16                                                  | 1.31 ± 0.36                                                  | 6.58 ± 0.38 | 25 ± 9      | 36 ± 19     | 38 ± 11     |

608
